# Supplementary material
Source: Frontiers journal article supplement (https://www.frontiersin.org/articles/342415)
Supplement: Data_Sheet_1.docx [file Data_Sheet_1.docx]

**MPLUS SYNTAX FOR THE COMBINED LST MODEL**

Title: Combined LST

DATA: File is LST.dat;

TYPE IS individual;

Variable: NAMES ARE

ID K11_SEX

Y1T1_C Y2T1_C Y3T1_C

Y1T2_C Y2T2_C Y3T2_C

Y1T3_C Y2T3_C Y3T3_C

Y1T1_T Y2T1_T Y3T1_T

Y1T2_T Y2T2_T Y3T2_T

Y1T3_T Y2T3_T Y3T3_T;

MISSING are all (999);

USEvariables are

Y1T1_C Y2T1_C Y3T1_C

Y1T2_C Y2T2_C Y3T2_C

Y1T3_C Y2T3_C Y3T3_C

Y1T1_T Y2T1_T Y3T1_T

Y1T2_T Y2T2_T Y3T2_T

Y1T3_T Y2T3_T Y3T3_T;

!!! Y1 FEEL SORRY FOR OTHERS

!!! Y2 FELL SORRY FOR OTHER CHILDREN TEASED

!!! Y3 FELL SORRY FOR OTHER CHILDREN SAD OR UPSET

!!! C = CAREGIVERS T = TEACHERS

Analysis:

Estimator = MLR;

Model:

!!!!!!!!!!!!!!!!!!!!SYMPATHY CAREGIVERS (parents) !!!!!!!!!!!!

!!!OCCASION SPECIFIC LATENT FACTORS (ZETA)

SYP_T1 BY Y1T1_C@1;

SYP_T1 BY Y2T1_C (G2);

SYP_T1 BY Y3T1_C (G3);

SYP_T2 BY Y1T2_C@1;

SYP_T2 BY Y2T2_C (G2);

SYP_T2 BY Y3T2_C (G3);

SYP_T3 BY Y1T3_C@1;

SYP_T3 BY Y2T3_C (G2);

SYP_T3 BY Y3T3_C (G3);

!!!!!INTERCEPTS!!!!

[Y1T1_C@0];

[Y2T1_C] (t2);

[Y3T1_C] (pt33); !!!!different intercept!!!

[Y1T2_C@0];

[Y2T2_C] (t2);

[Y3T2_C] (t3);

[Y1T3_C@0];

[Y2T3_C] (t2);

[Y3T3_C] (t3);

!!!!!!!VARIABILITY OF STATE FACTORS!!!!!

SYP_T1 (state1);

SYP_T2 (state1);

SYP_T3 (state1);

!!!!!!TRAIT FACTOR!!!!

KSIP BY Y1T1_C@1

Y2T1_C (L2)

Y3T1_C (pL33) !!! different factor loading

Y1T2_C@1

Y2T2_C (L2)

Y3T2_C (L3)

Y1T3_C@1

Y2T3_C (L2)

Y3T3_C (L3);

[KSIP]; !!!latent mean of the latent trait factor KSIP!!!

KSIP (varP); !!!variance of the latent trait factor KSIP!!!

!!!!! CORRELATIONS AMONG LATENT STATE AND TRAIT FACTORS FIXED TO BE ZERO!!!!!

SYP_T1 WITH SYP_T2@0 SYP_T3@0;

SYP_T2 WITH SYP_T3@0;

KSIP WITH SYP_T1@0 SYP_T2@0 SYP_T3@0;

!!!!!!!!!!!!!!!!!!!!!!!!!!!!!!!SYMPATHY TEACHER!!!!!!!!!!!!!!!!!!!!!!!!!!!!!!!

!!!!!OCCASION SPECIFIC FACTORS (ZETA)!!!!!

SYMT_T1 BY Y1T1_T@1 ;

SYMT_T1 BY Y2T1_T (G2);

SYMT_T1 BY Y3T1_T (G3);

SYMT_T2 BY Y1T2_T@1;

SYMT_T2 BY Y2T2_T (G2);

SYMT_T2 BY Y3T2_T (G3);

SYMT_T3 BY Y1T3_T@1;

SYMT_T3 BY Y2T3_T (G2);

SYMT_T3 BY Y3T3_T (G3);

[Y1T1_T@0];

[Y2T1_T] (t2) ;

[Y3T1_T] (t3);

[Y1T2_T@0];

[Y2T2_T] (t2);

[Y3T2_T] (t3);

[Y1T3_T@0];

[Y2T3_T] (t2);

[Y3T3_T] (t3);

!!!!!!!!VARIABILITY OF STATE FACTORS!!!!!

SYMT_T1 (state2);

SYMT_T2 (state2);

SYMT_T3 (state2);

!!!!!!!!!LATENT TRAIT FACTOR KSIT!!!!!!

KSIT BY Y1T1_T@1

Y2T1_T (L2)

Y3T1_T (L3)

Y1T2_T@1

Y2T2_T (L2)

Y3T2_T (L3)

Y1T3_T@1

Y2T3_T (L2)

Y3T3_T (L3);

[KSIT]; !!!LATENT MEAN OF THE TRAIT FACTOR KSIT!!!

KSIT (varT); !!!! VARIANCE OF THE TRAIT FACTOR KSIT!!!

!!!!!!!!!!INDEXES OF CROSS-INFORMANT CONSISTENCY AT THE STATE LEVEL!!!!!!!

SYP_T1 WITH SYMT_T1 (r1);

SYP_T2 WITH SYMT_T2 (r1);

SYP_T3 WITH SYMT_T3 (r1);

!!!!!!!!!!INDEX OF CROSS-INFORMANT CONSISTENCY AT THE TRAIT LEVEL!!!!!!!

KSIP with KSIT;

!!!!!!! CORRELATIONS AMONG LATENT STATE AND TRAIT FACTORS FIXED TO BE ZERO!!!!!!

SYMT_T1 WITH SYMT_T2@0 SYMT_T3@0;

SYMT_T2 WITH SYMT_T3@0;

KSIT WITH SYMT_T1@0 SYMT_T2@0 SYMT_T3@0;

!CORR AMONG LATENT STATE AND TRAIT FACTORS FIXED TO BE ZERO ACROSS INFORMANTS!!!!!!

SYP_T1 WITH SYMT_T2@0 SYMT_T3@0;

SYP_T2 WITH SYMT_T1@0 SYMT_T3@0;

SYP_T3 WITH SYMT_T1@0 SYMT_T2@0;

KSIP WITH SYMT_T1@0 SYMT_T2@0 SYMT_T3@0;

KSIT WITH SYP_T1@0 SYP_T2@0 SYP_T3@0;

output:

sampstat standardized modindices (3.84) cinterval residual tech1 tech4;
